# Supplementary material for: Aspergillus terreus obtained from mangrove exhibits antagonistic activities against Pythium aphanidermatum-induced damping-off of cucumber
Source: PeerJ. 2019 Oct 21;7:e7884. doi: 10.7717/peerj.7884 (PMC6812666; doi:10.7717/peerj.7884)
Supplement: Supplemental Information 1 [file peerj-07-7884-s001.xlsx]

## Sheet: Inhibition zone
Replicate	Aspergillus tubingensis	Aspergillus terreus
1	5.5	2
2	7	1
3	6.5	4
4	6
	Aspergillus tubingensis	Aspergillus terreus
	6.25	2.33333
Asptub	5.5
Asptub	7
Asptub	6.5
Asptub	6
aspter	2
aspter	1
aspter	4

## Sheet: path.1
	rep.	shoot length(cm)	fresh weight(g)	dry weight(g)
control	1	5	1.687	0.13
	1	3.9	1.401	0.09
	1	4	1.245	0.918
	1	3	1.683	0.9
	1	4.1	1.45	0.12
	1	4.2	1.324	0.12
	2	2.8	0.718	0.037
	2	4	1.263	0.099
	2	4.1	1.221	0.91
	2	4	1.98	0.149
	2	4.2	0.889	0.05
	2	3.7	1.3	0.099
	3	5	0.945	0.053
	3	3.5	1.647	0.121
	3	2.9	1.489	0.098
	3	3	1.544	0.13
	3	2	0.265	0.015
	3	3	2.006	0.14
	4	4.1	2.282	0.168
	4	4.2	1.812	0.12
	4	4.1	1.725	0.126
	4	3.6	1.197	0.071
	4	3.8	2.1	0.16
	4	0	0	0
	5	3.8	1.727	0.11
	5	4	1.812	0.16
	5	4.2	1.054	0.05
	5	1	0.08	0.01
	5	4.2	1.33	0.03
	5	0	0	0
pythium	1	3.5	1.596	0.13
	1	0	0	0
	1	0	0	0
	1	0	0	0
	1	0	0	0
	1	0	0	0
	2	0	0	0
	2	0	0	0
	2	0	0	0
	2	0	0	0
	2	0	0	0
	2	0	0	0
	3	2.4	0.164	0.02
	3	0	0	0
	3	0	0	0
	3	0	0	0
	3	0	0	0
	3	0	0	0
	4	0	0	0
	4	0	0	0
	4	0	0	0
	4	0	0	0
	4	0	0	0
	4	0	0	0
	5	0	0	0
	5	0	0	0
	5	0	0	0
	5	0	0	0
	5	0	0	0
	5	0	0	0
pythium +asp.	1	4.1	1.196	0.086
	1	4.4	1.122	0.08
	1	4.6	1.541	0.113
	1	3.6	1.363	0.1
	1	0	0	0
	1	0	0	0
	2	3.9	1.611	0.122
	2	3.5	1.202	0.09
	2	3.8	1.337	0.109
	2	4	1.35	0.098
	2	0	0	0
	2	0	0	0
	3	4.1	1.014	0.061
	3	4	1.521	0.112
	3	4	1.5	0.115
	3	4.6	0.61	0.26
	3	0	0	0
	3	0	0	0
	4	3.2	1.547	0.137
	4	3.8	1.763	0.145
	4	4	1.465	0.137
	4	3.9	1.662	0.129
	4	0	0	0
	4	0	0	0
	5	4.1	1.52	0.12
	5	4	1.62	0.13
	5	3.8	1.45	0.131
	5	4.1	1.39	1.02
	5	3.6	1.2	0.091
	5	0	0	0
asp. without pythium	1	4.1	1.48	0.041
	1	3.8	1.22	0.079
	1	3.6	1.389	0.122
	1	0	0	0
	1	0	0	0
	1	0	0	0
	2	4.1	1.359	0.111
	2	3.9	1.38	0.099
	2	4.2	1.594	0.141
	2	4.6	1.785	0.138
	2	4.1	2.15	0.171
	2	0	0	0
	3	4	1.8	0.127
	3	4	0.965	0.059
	3	4.2	0.612	0.11
	3	0	0	0
	3	0	0	0
	3	0	0	0
	4	4.1	1.644	0.121
	4	4	1.386	0.095
	4	3.4	1.158	0.074
	4	4.1	1.62	0.134
	4	4	1.017	0.067
	4	4.3	1.245	0.087
	5	4	1.325	0.198
	5	4.2	1.506	0.105
	5	3.7	1.125	0.089
	5	3.8	1.716	0.103
	5	0	0	0
	5	0	0	0

## Sheet: path.2
	rep	Shoot Length (cm)	fresh weight(g)	dry weight(g)
control	1	6	2.096	0.14
	1	4.5	0.689	0.029
	1	6.5	1.995	0.112
	1	4.5	1.25	0.051
	1	6	1.765	0.112
	1	0	0	0
	2	4.5	1.839	0.103
	2	3	1.568	0.06
	2	3.5	1.548	0.04
	2	5	1.783	0.078
	2	5	0.887	0.004
	2	0	0	0
	3	2.9	1.227	0.01
	3	3.6	1.55	0.056
	3	3.3	1.745	0.075
	3	3.5	1.892	0.06
	3	4.2	0.737	0.038
	3	2.8	1.629	0.043
	4	4	1.703	0.032
	4	3.9	1.759	0.032
	4	3.9	1.43	0.1
	4	3.5	1.521	0.096
	4	5	1.047	0.059
	4	5.3	0.908	0.031
	5	4.5	1.45	0.091
	5	5	1.659	0.092
	5	4.2	2.253	0.126
	5	3.7	0.685	0.018
	5	0	0	0
	5	0	0	0
pythium	1	0	0	0
	1	0	0	0
	1	0	0	0
	1	0	0	0
	1	0	0	0
	1	0	0	0
	1	0	0	0
	2	0	0	0
	2	0	0	0
	2	0	0	0
	2	0	0	0
	2	0	0	0
	2	0	0	0
	3	0	0	0
	3	0	0	0
	3	0	0	0
	3	0	0	0
	3	0	0	0
	3	0	0	0
	4	0	0	0
	4	0	0	0
	4	0	0	0
	4	0	0	0
	4	0	0	0
	4	0	0	0
	5	0	0	0
	5	0	0	0
	5	0	0	0
	5	0	0	0
	5	0	0	0
	5	0	0	0
pythium +asp.	1	2.5	1.187	0.059
	1	3.6	0.597	0.016
	1	3.9	0.984	0.042
	1	4	1.124	0.053
	1	0	0	0
	1	0	0	0
	1	0	0	0
	2	4	1.201	0.067
	2	4.1	1.312	0.052
	2	4.3	1.352	0.037
	2	3.9	1.22	0.025
	2	3.7	1.157	0.03
	2	0	0	0
	3	2.8	1.187	0.079
	3	3.6	1.31	0.102
	3	2	1.32	0.065
	3	2	1.51	0.0376
	3	3.3	1.41	0.051
	3	0	0	0
	4	3.5	1.24	0.052
	4	4	1.367	0.089
	4	4.2	1.64	0.068
	4	3.8	1.247	0.059
	4	3.5	1.165	0.04
	4	0	0	0
	5	3.5	1.19	0.048
	5	3.7	0.845	0.042
	5	3.5	0.975	0.05
	5	3.9	1.01	0.41
	5	4	1.381	0.069
	5	0	0	0
asp. without pythium	1	3.5	1.392	0.141
	1	5	2.281	0.17
	1	3	1.949	0.146
	1	5	1.471	0.096
	1	0	0	0
	1	0	0	0
	2	1.1	0.237	0.013
	2	3.5	1.485	0.107
	2	3	2.251	0.17
	2	3.8	1.788	0.118
	2	0	0	0
	2	0	0	0
	3	3.5	1.987	0.156
	3	4.8	2.363	0.181
	3	3.5	1.361	0.121
	3	3.4	0.728	0.041
	3	4.5	2.023	0.155
	3	3.7	0.934	0.045
	4	4.1	0.773	0.044
	4	4.6	1.364	0.087
	4	5.3	0.904	0.076
	4	4.5	2.056	0.163
	4	6	1.751	0.125
	4	5	2.261	0.177
	5	3.8	0.785	0.054
	5	4.7	11.485	0.11
	5	4.2	1.66	0.054
	5	4.6	1.159	0.0518
	5	4.5	2.71	0.198
	5	0	0	0

## Sheet: Mortality
Mortality
tret.	pot 1	pot 2	pot 3	pot 4	pot 5	avg	%
control	0	0	0	0	1	0.2	3.33333
pythium	5	6	5	6	6	5.6	93.3333
Pythium+asp	2	2	2	2	1	1.8	30
asp without pythium	3	1	3	0	2	1.8	30
tret.	pot 1	pot 2	pot 3	pot 4	pot 5	avg	%
control	1	1	0	0	2	0.8	16
pythium	6	6	6	6	6	6	100
Pythium+asp	3	1	1	1	1	1.4	23.3333
asp without pythium	2	2	0	0	1	1	16.6667
